# Supplementary material
Source: PubMed Central journal article supplement (PMC10979463)

# Figure S1

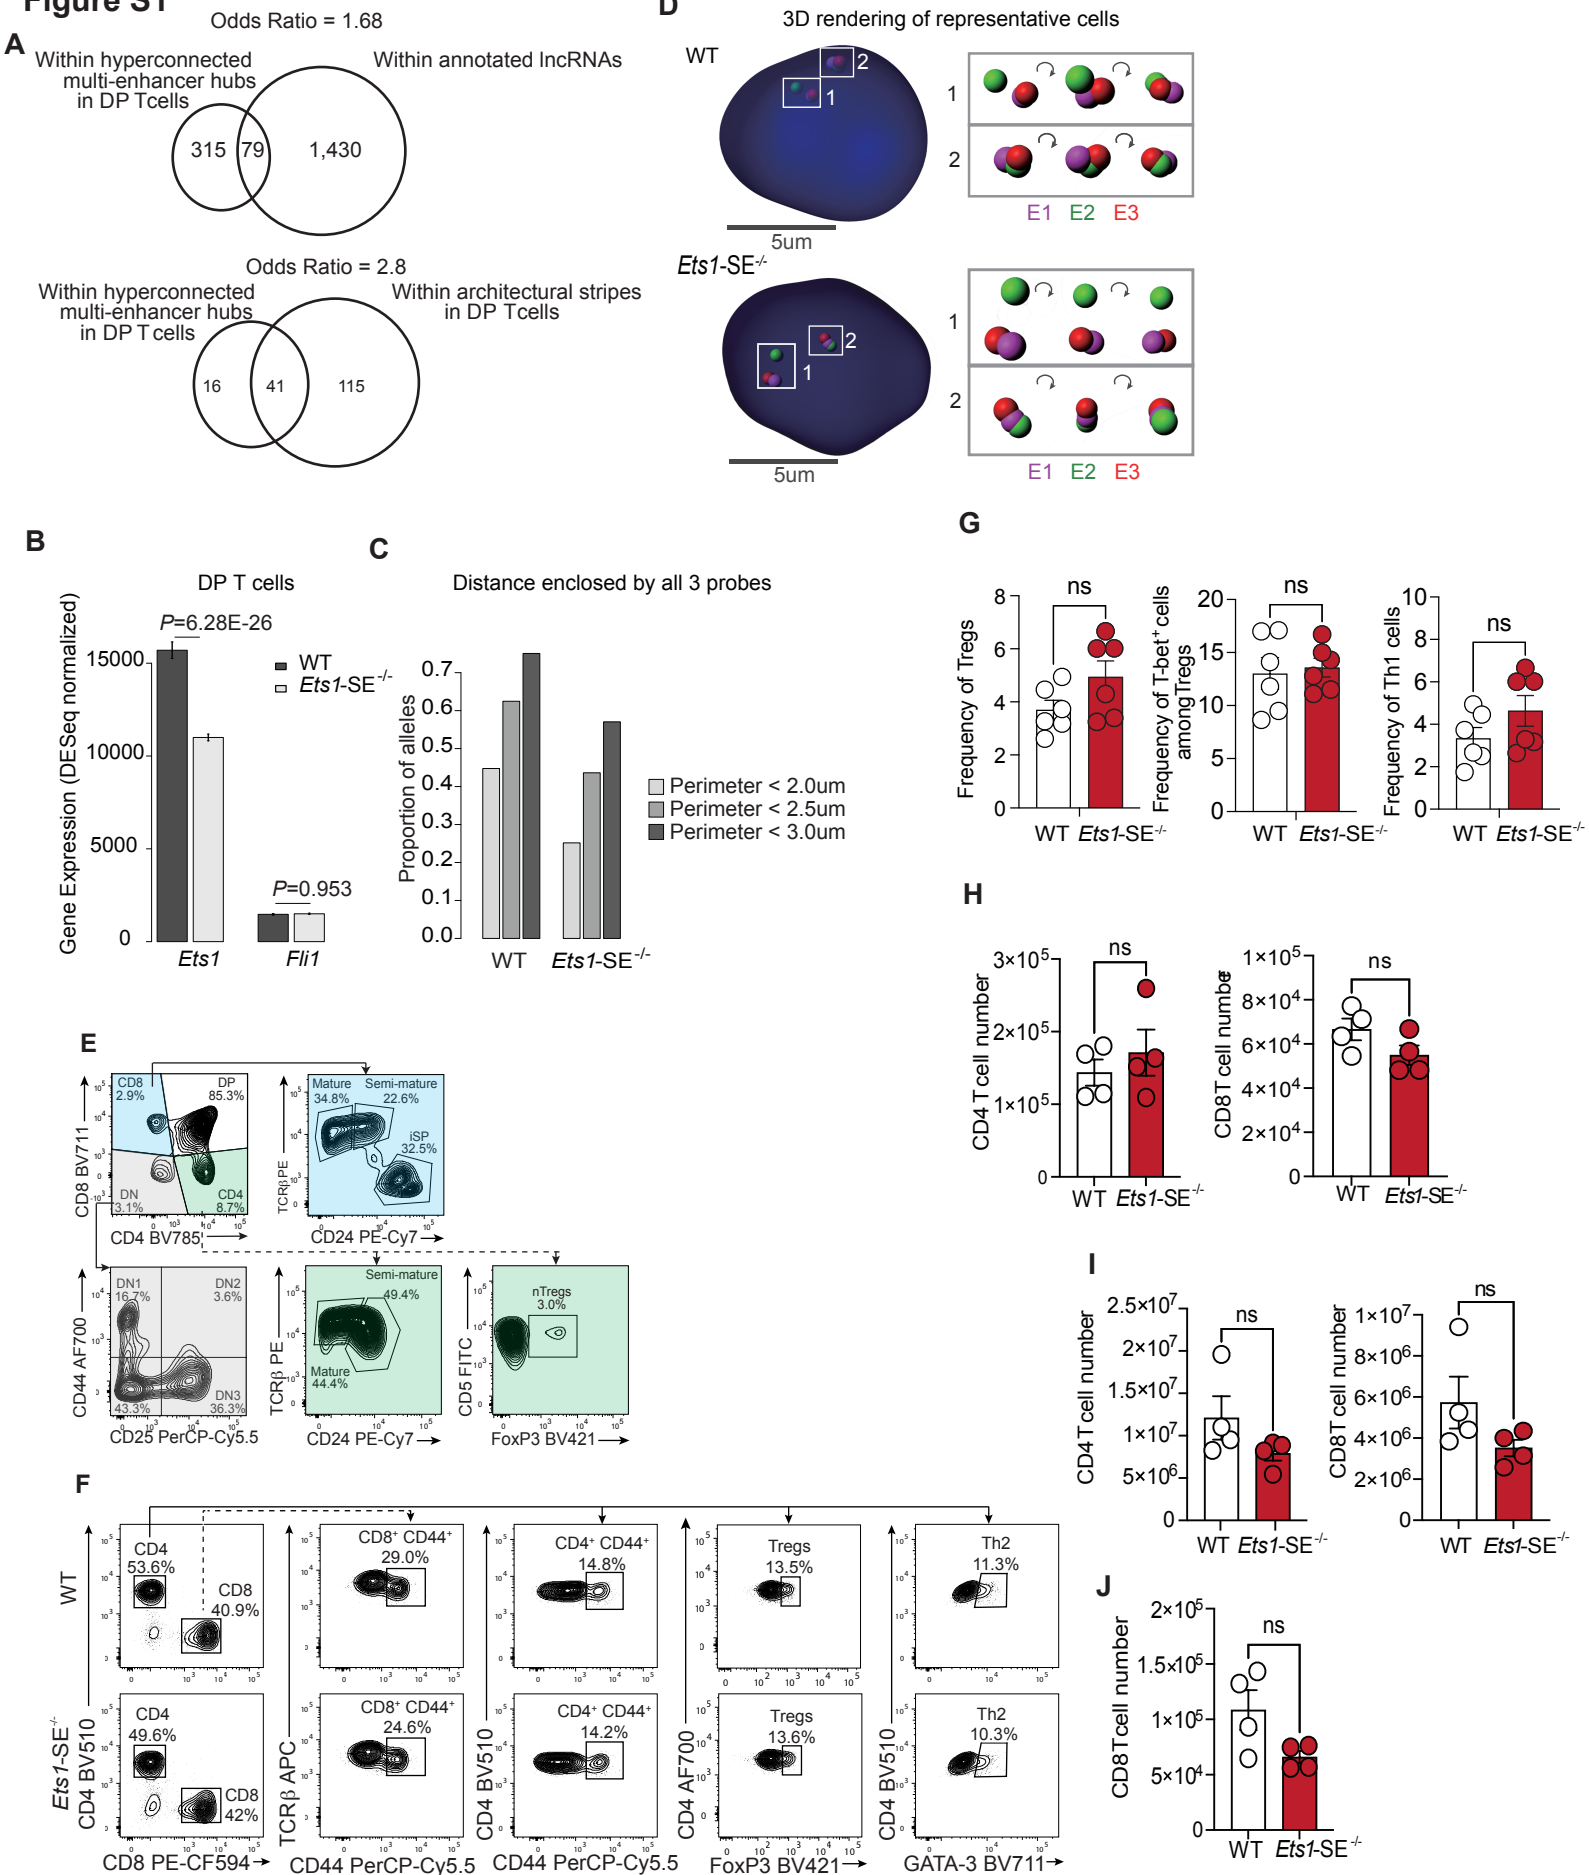

**Figure S2**

**A**

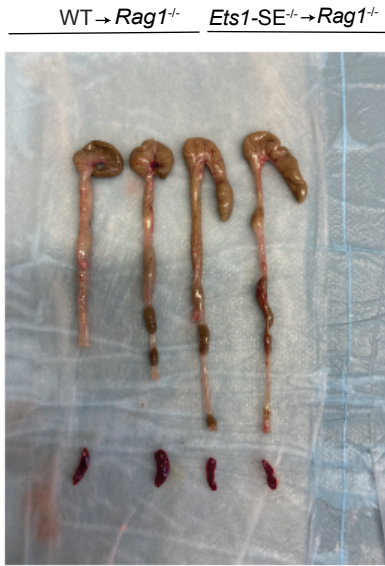

**B**

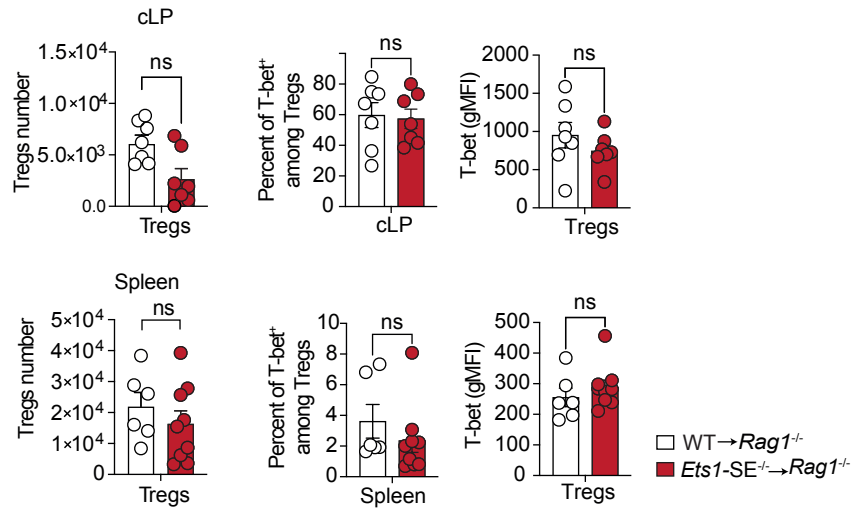

**C**

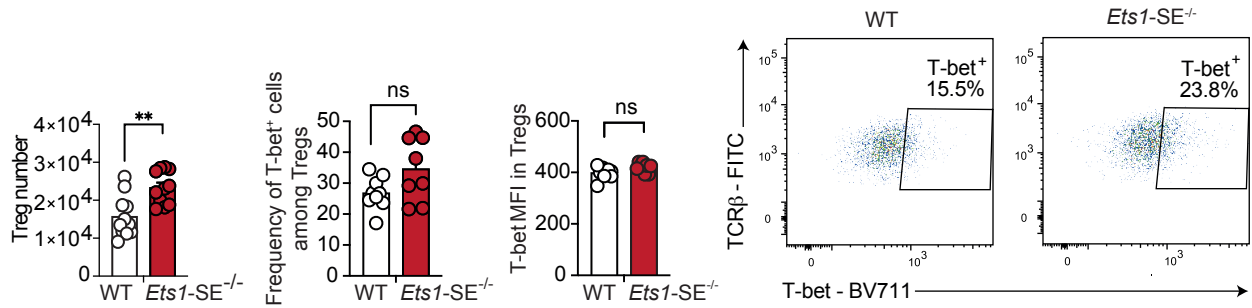

**D**

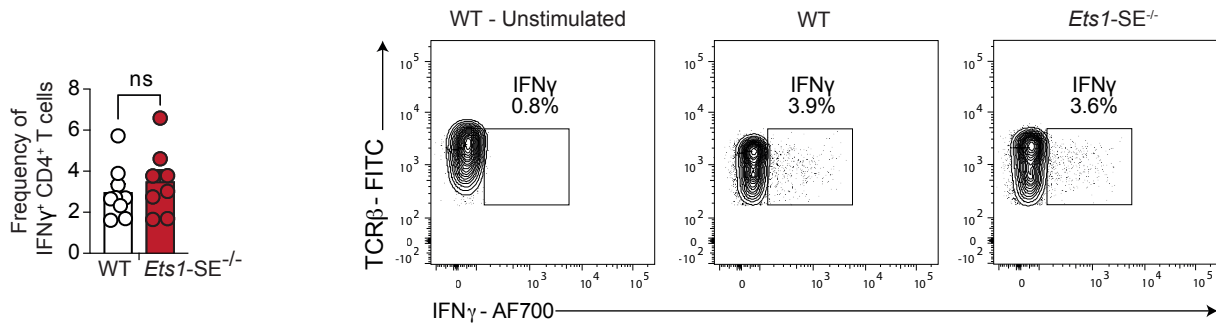

**Figure S3**

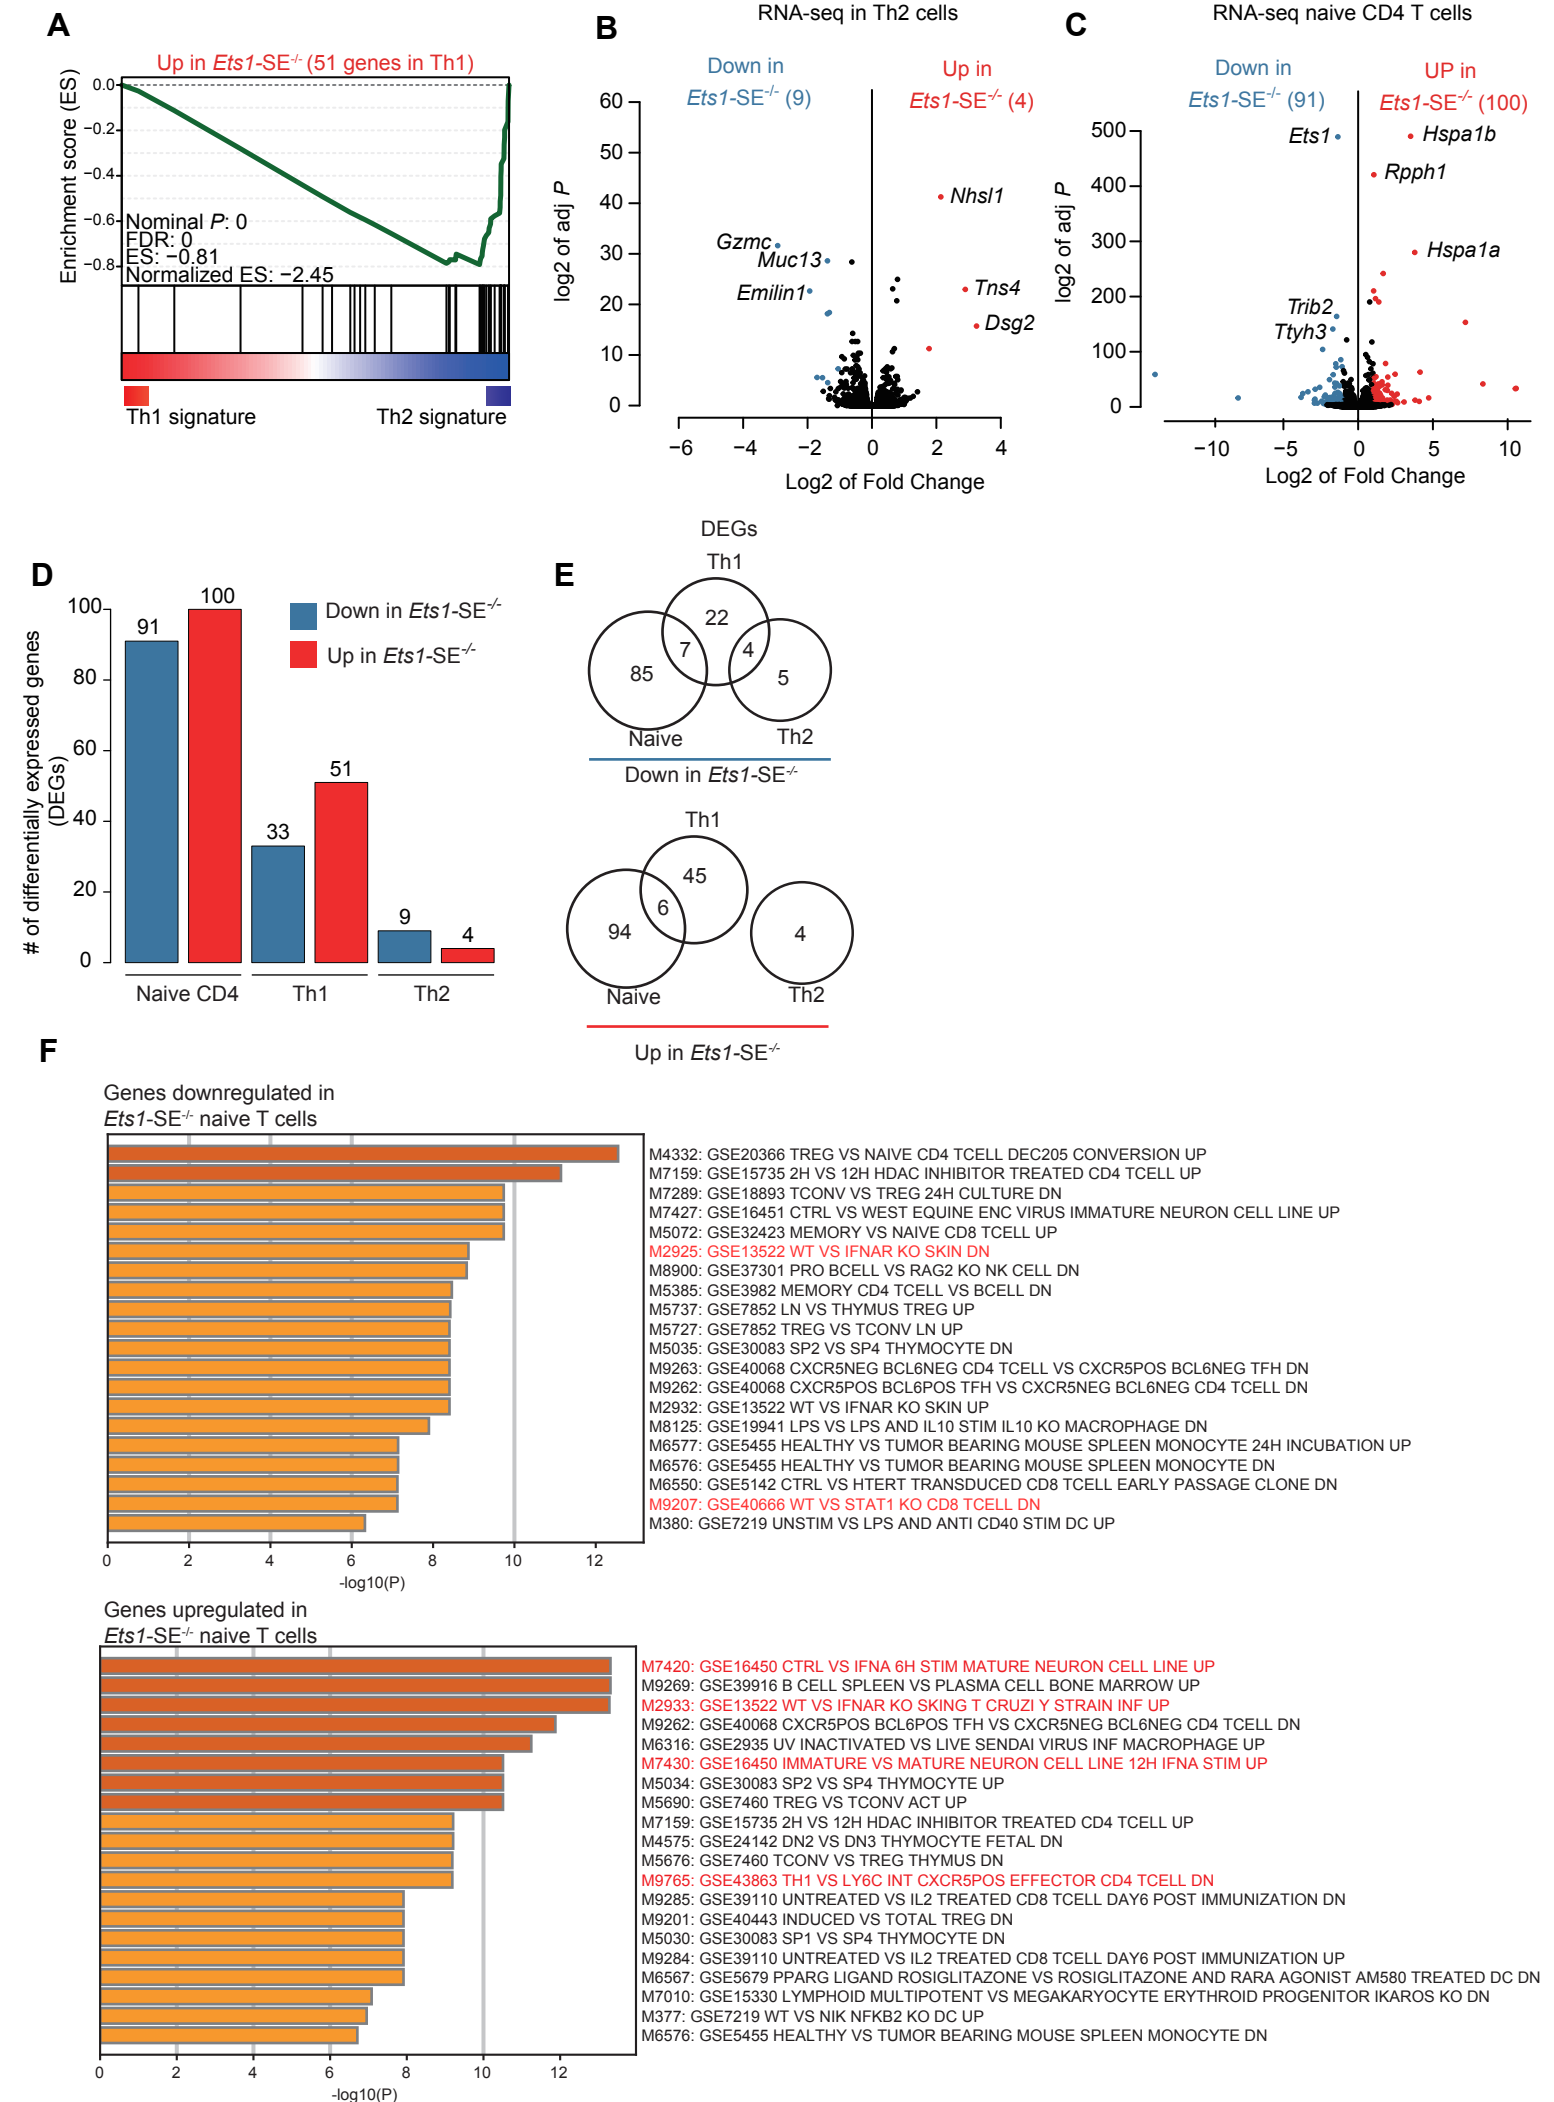

**Figure S4**

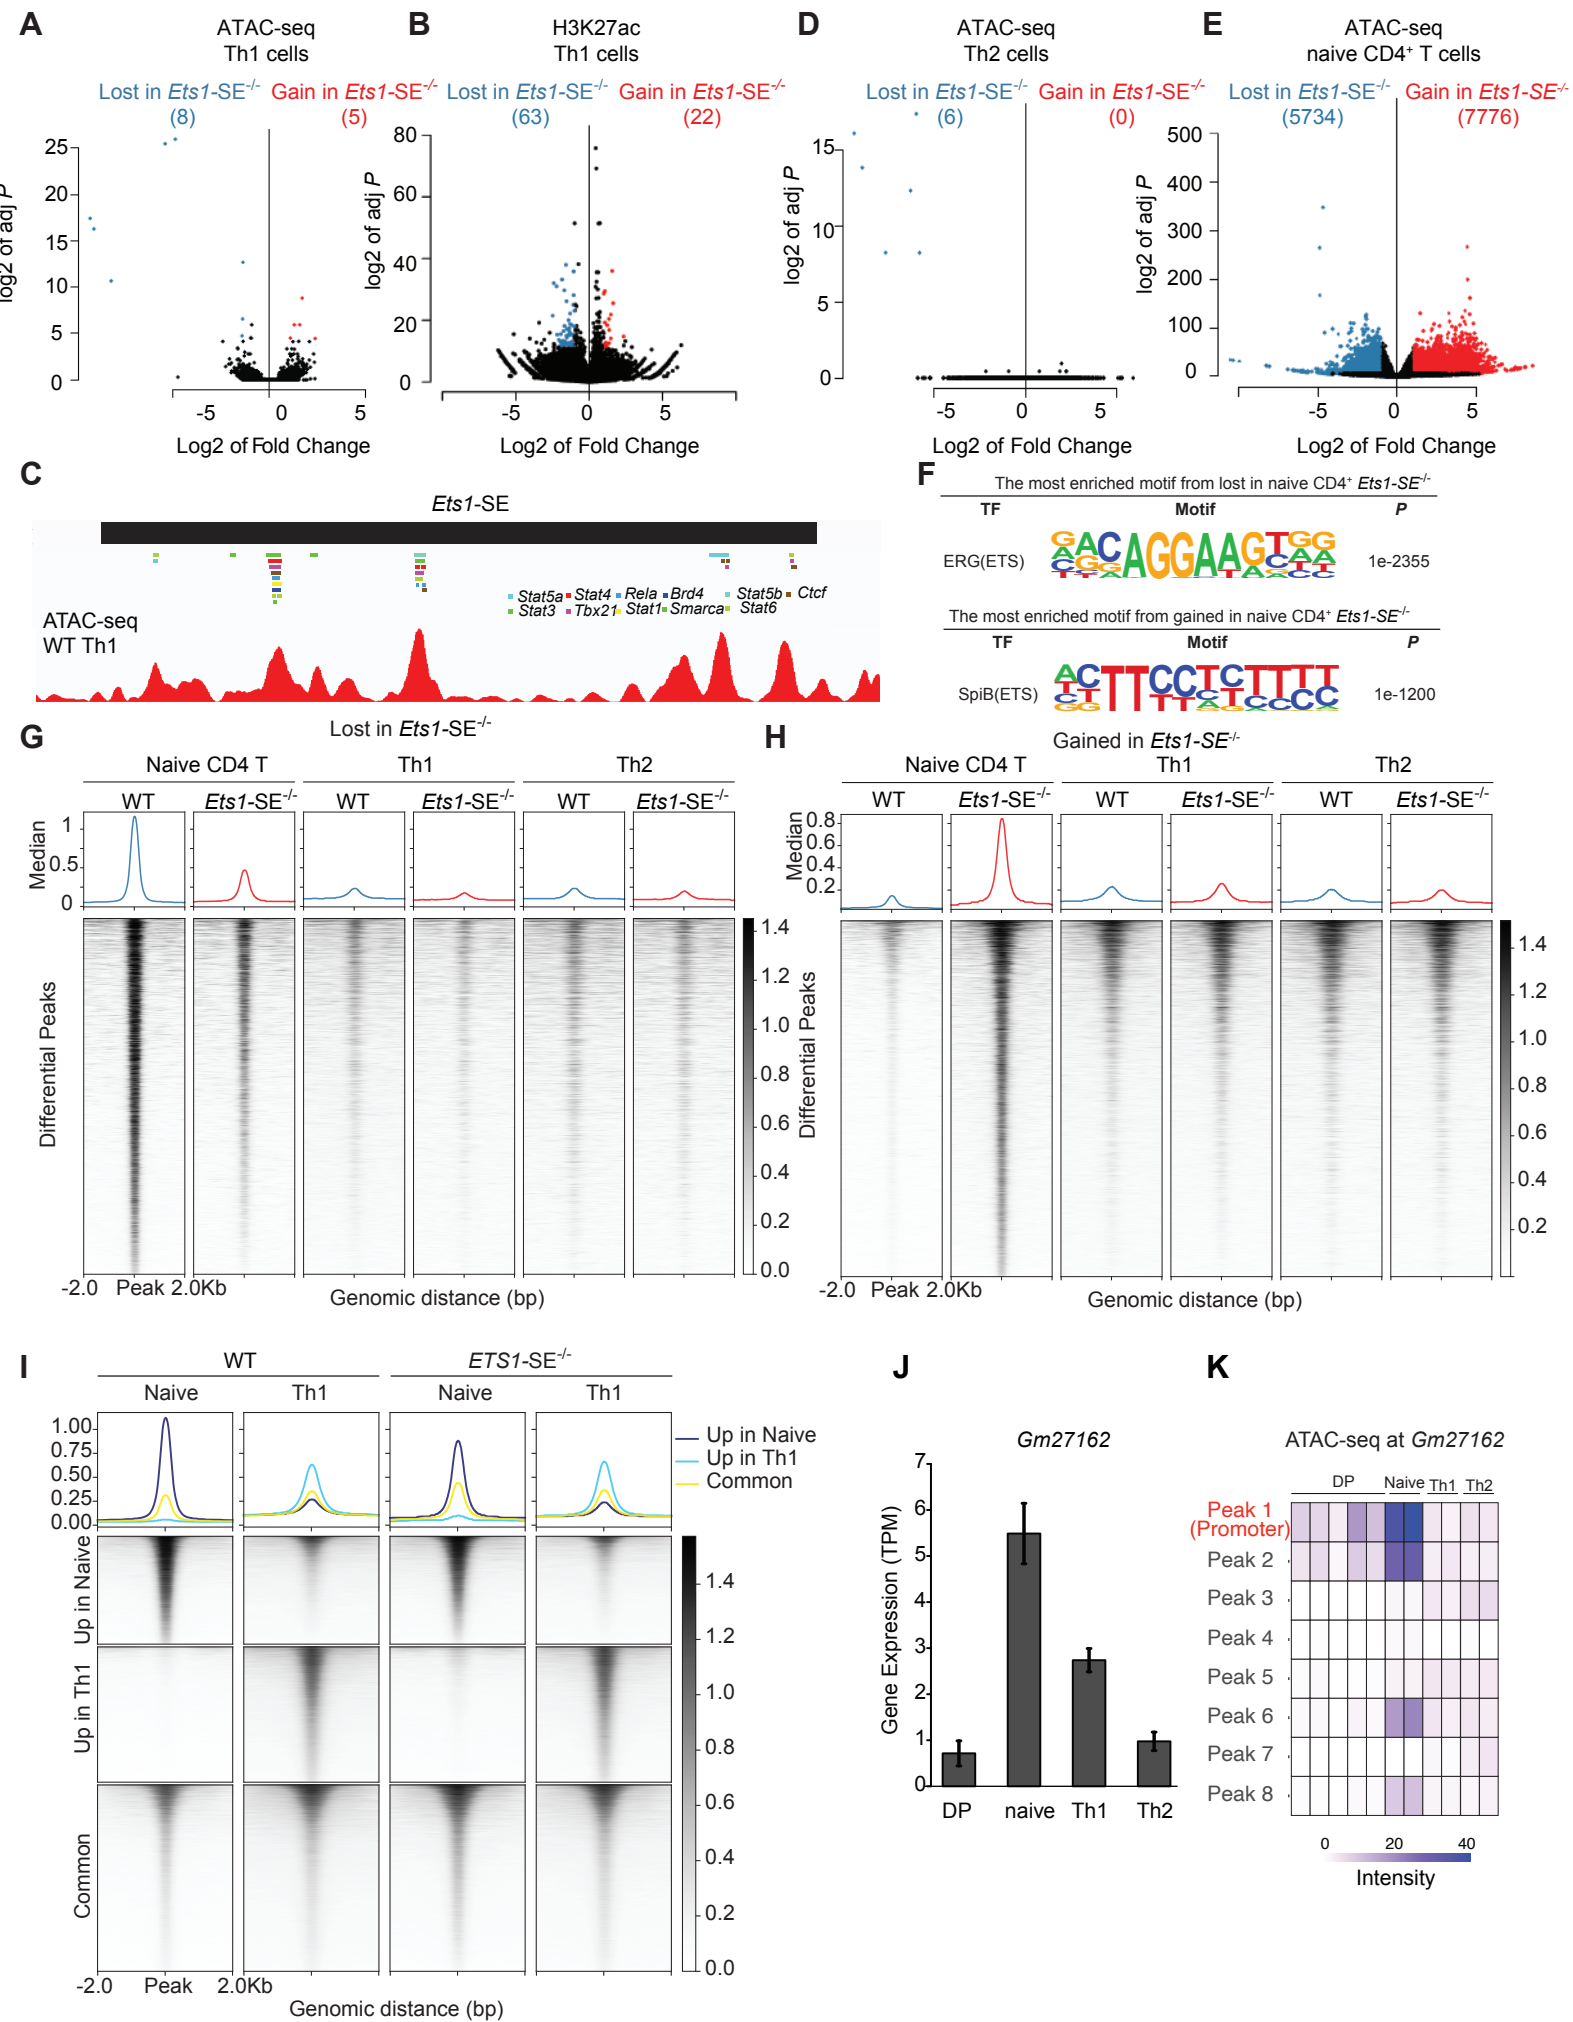

**Figure S5**

**A**

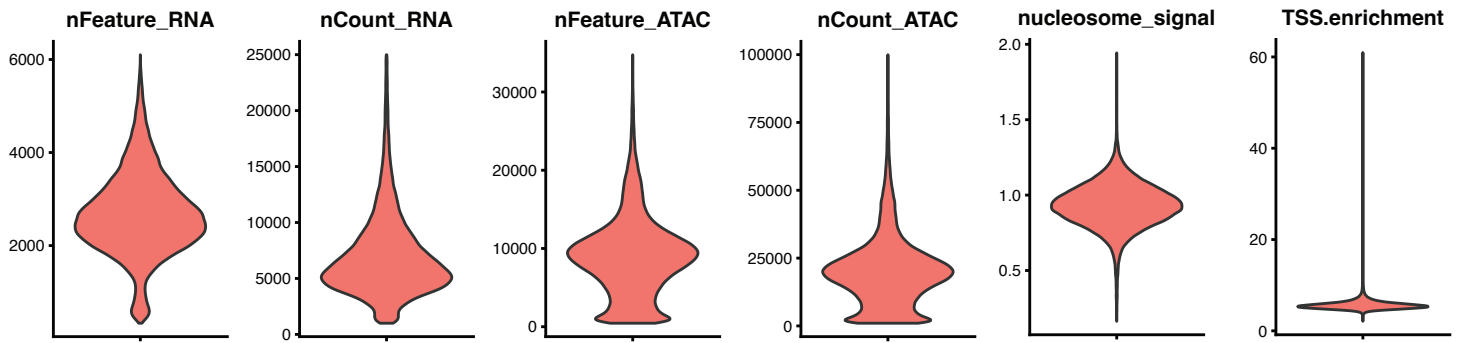

**B**

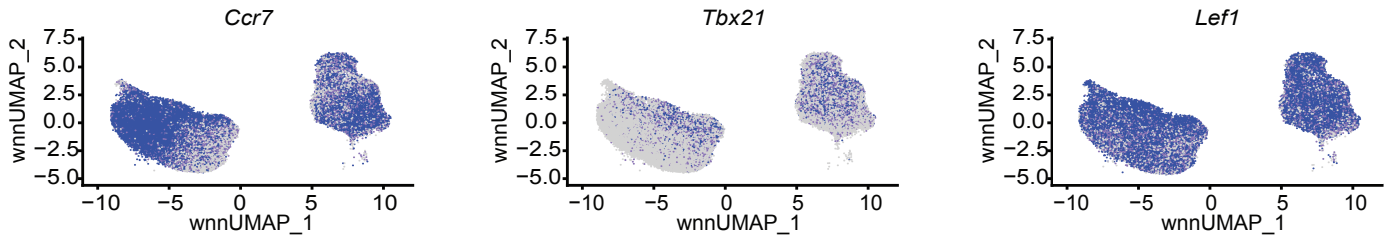

**C**

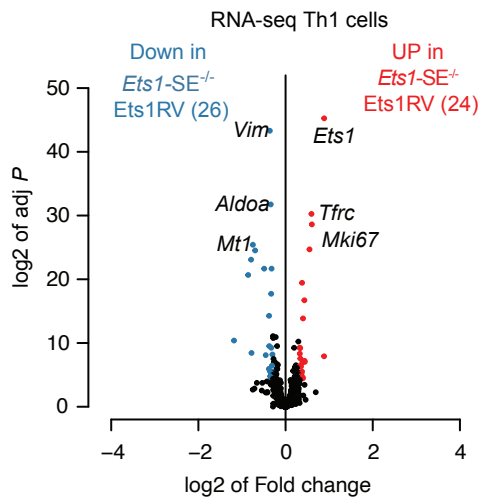

**D**

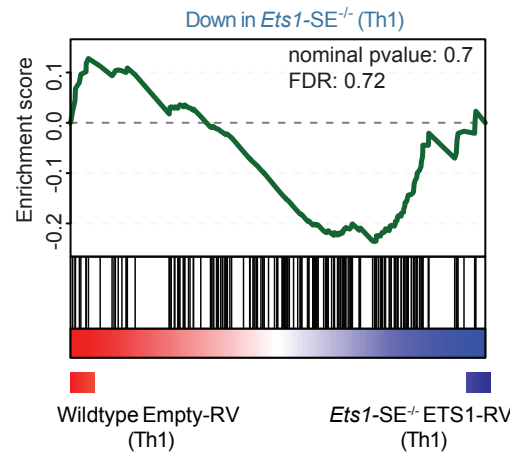

**E**

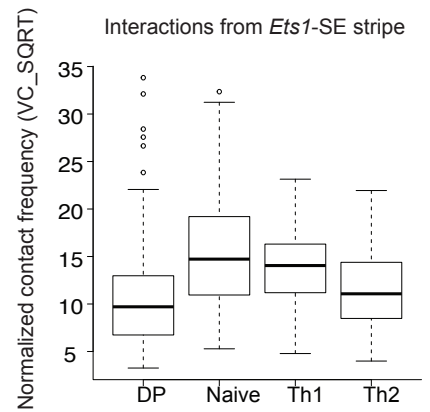

**F**

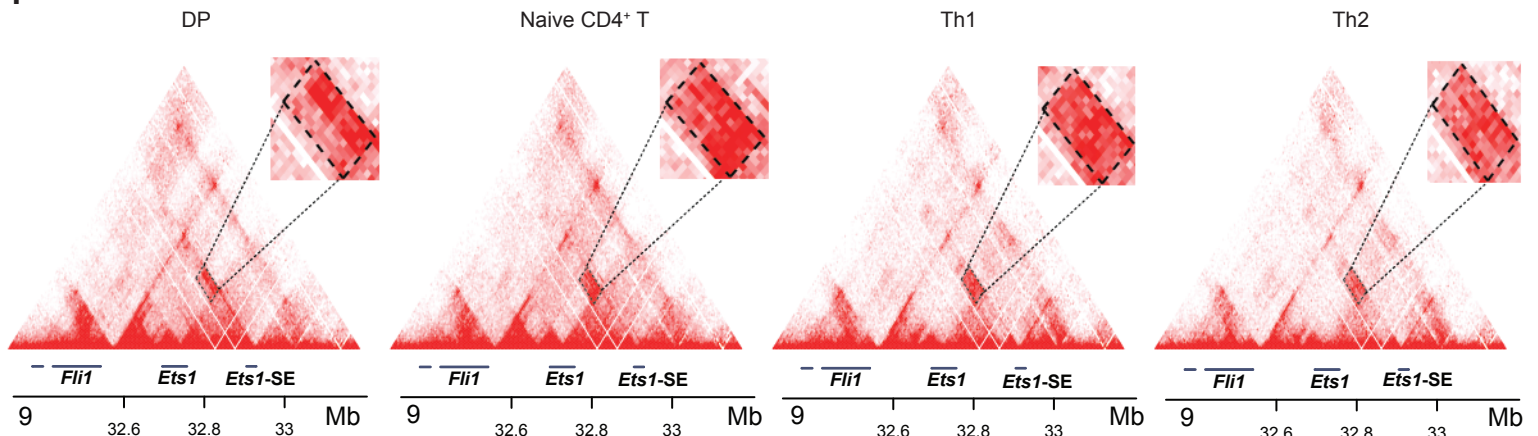

**G**

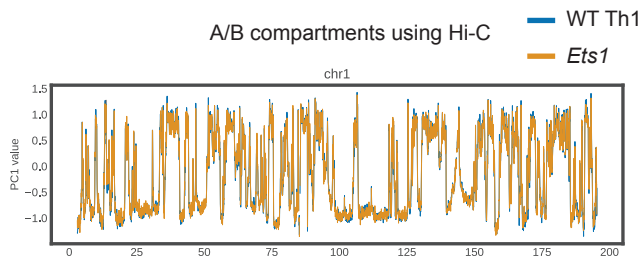

**H**

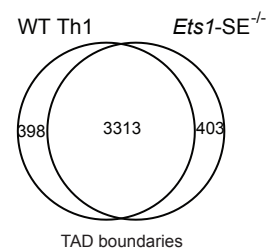

**Figure S6****A**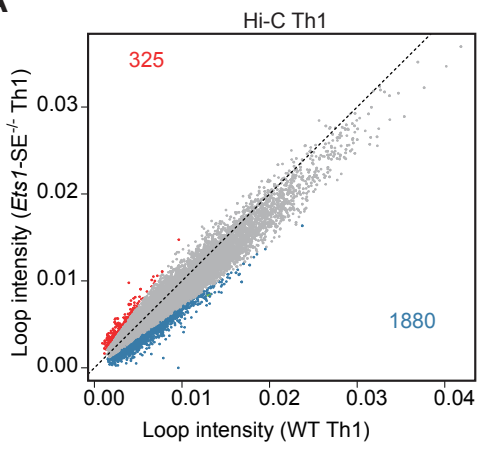**B**Genes within lost loops in *Ets1-SE<sup>-/-</sup>* Th1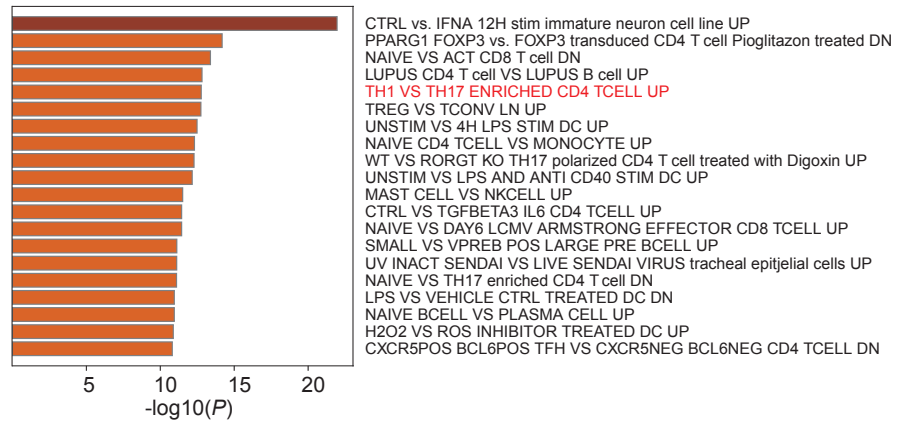**C**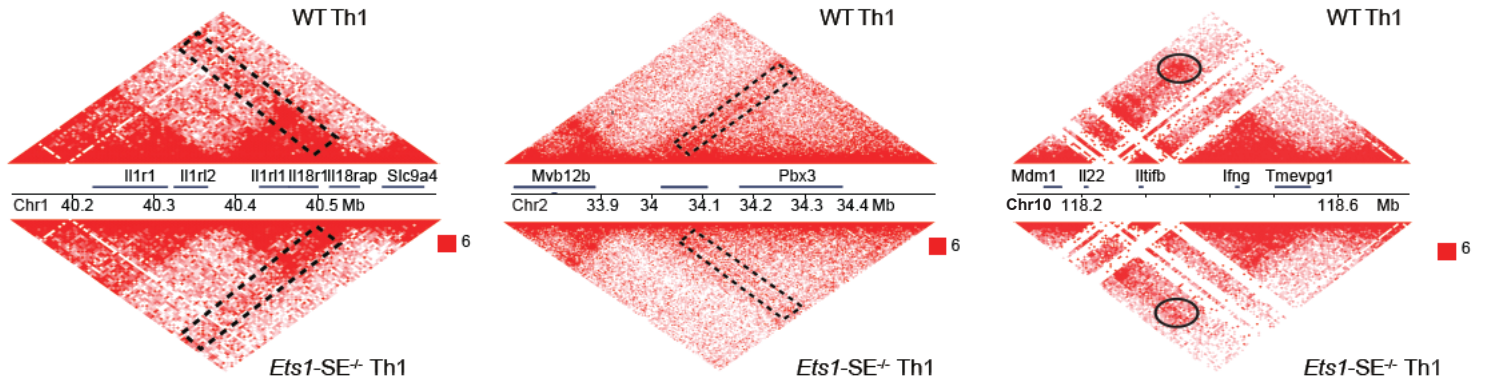**D**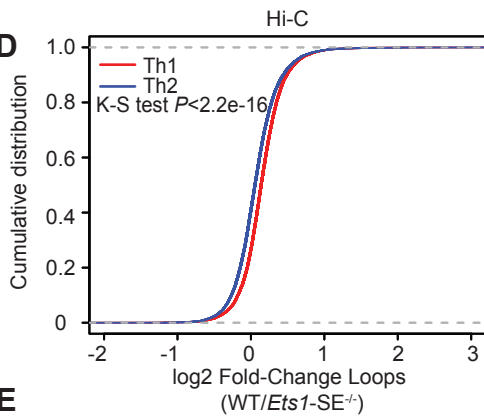**E**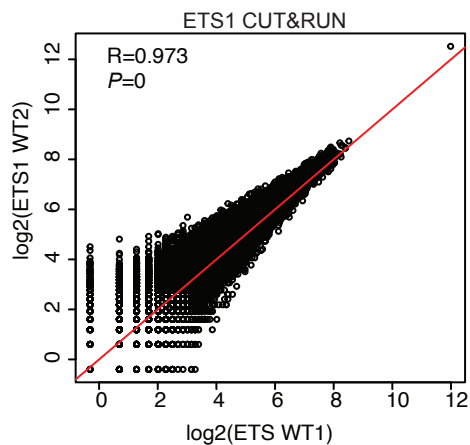**F**

All ETS1 CUT&amp;RUN peaks

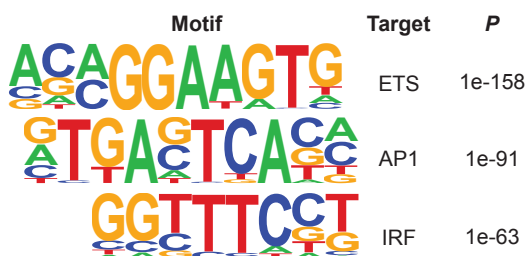**G**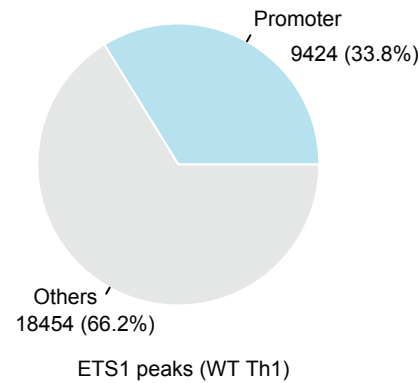**H**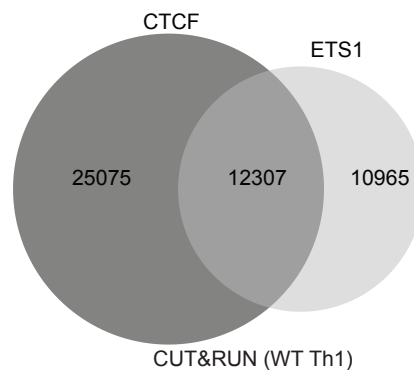**I**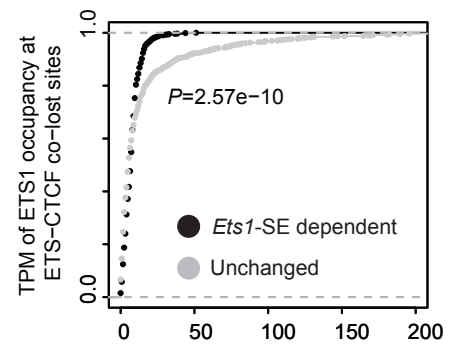**J**

ETS1 and CTCFco-lost peaks (988 regions)

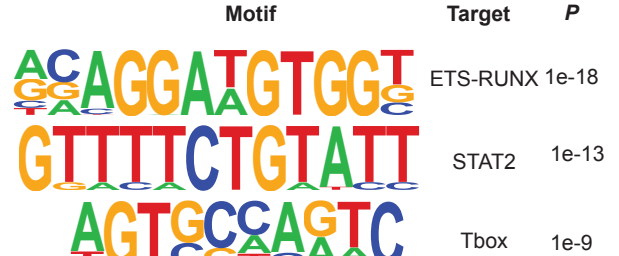

Supplement: NIHMS1977678-supplement-Supplemental_Figures.pdf [file NIHMS1977678-supplement-Supplemental_Figures.pdf]
